# Supplementary material for: Multi-metal element analysis for the identification of foodborne pathogenic bacteria
Source: Royal Society of Chemistry journal article supplement (doi:10.1039/c6ay01408a), 2016-01-01
Supplement: c6ay01408a1.pdf [file c6ay01408a1.pdf]

## Electronic Supporting Information (ESI)

### Multi-element analysis for identification of foodborne pathogenic bacteria

Xingxing Zhang<sup>a</sup>, Xueling Li<sup>b\*</sup>, Yadi Wang<sup>a</sup>, Shunfeng Hu<sup>d</sup>, Qilong Xu<sup>c</sup>, Jun Hu<sup>a</sup>, Junhong  
Lü<sup>a,\*</sup>

<sup>a</sup> *Division of Physical Biology, Key Laboratory of Interfacial Physics and Technology, Shanghai  
Institute of Applied Physics, Chinese Academy of Sciences, Shanghai 201800, China*

<sup>b</sup> *Shanghai Center for Bioinformation Technology, Shanghai Academy of Science & Technology;  
Center for Clinical and translational medicine, Shanghai Industrial Technology Institute, Shanghai  
201203, China*

<sup>c</sup> *Southern Microbiological Services, Louisiana 70820, USA*

<sup>d</sup> *Rizhao Entry-Exit Inspection and Quarantine Bureau, Rizhao 276826, China*

*\*Correspondence author:*

*Email address:* [lujunhong@sinap.ac.cn](mailto:lujunhong@sinap.ac.cn) (J. Lu); [xlli@scbit.org](mailto:xlli@scbit.org) (X.Li)

**Table S1** Results of major and minor elements in different types of foodborne pathogens by ICP-MS (ng/mL)

| Element | <i>Staphylococcus</i> spp. |       |       |      | <i>Listeria</i> spp. |        |        |      | <i>Salmonella</i> spp. |       |      |     | <i>Shigella</i> spp. |      |        |      | <i>Escherichia</i> spp. |       |        |       | <i>Yersinia enterocolitica</i> |       |      |        | <i>Vibrio</i> spp. |        |      |        |
|---------|----------------------------|-------|-------|------|----------------------|--------|--------|------|------------------------|-------|------|-----|----------------------|------|--------|------|-------------------------|-------|--------|-------|--------------------------------|-------|------|--------|--------------------|--------|------|--------|
|         | mean                       | min   | max   | SD   | mean                 | min    | max    | SD   | mean                   | min   | max  | SD  | mean                 | min  | max    | SD   | mean                    | min   | max    | SD    | mean                           | min   | max  | SD     | mean               | min    | max  | SD     |
| Ca*     | 673.1                      | 570.1 | 804.1 | 84.6 | 1546.8               | 1459.9 | 1627.4 | 69.3 | 1362.5                 | 1093  | 1638 | 262 | 1028.5               | 924  | 1087.8 | 90.8 | 1182                    | 995.4 | 1452.7 | 673.1 | 570.1                          | 804.1 | 84.6 | 1546.8 | 1459.9             | 1627.4 | 69.3 | 1362.5 |
| Fe*     | 49.1                       | 38.9  | 67.1  | 11.3 | 47.2                 | 41.2   | 52.2   | 4.7  | 69.6                   | 61.3  | 80   | 7.8 | 45.6                 | 43.2 | 46.9   | 2.1  | 93.3                    | 56.7  | 143.2  | 49.1  | 38.9                           | 67.1  | 11.3 | 47.2   | 41.2               | 52.2   | 4.7  | 69.6   |
| Si      | 143.6                      | 128.9 | 149.7 | 8.4  | 187.8                | 172.4  | 207.8  | 16.6 | 155.4                  | 151.8 | 163  | 5.2 | 131.3                | 117. | 145.5  | 14.1 | 117.                    | 109.2 | 124.6  | 143.6 | 128.9                          | 149.7 | 8.4  | 187.8  | 172.4              | 207.8  | 16.6 | 155.4  |
|         |                            |       |       |      |                      |        |        |      |                        | 3     |      |     |                      |      |        |      |                         | 9     |        |       |                                |       |      |        |                    |        |      |        |
| Ti*     | 16.7                       | 14.1  | 18.7  | 1.8  | 21.3                 | 20.2   | 22.1   | 0.8  | 21                     | 19.8  | 23.3 | 1.6 | 18.9                 | 18.8 | 19.3   | 0.3  | 20                      | 19.5  | 20.5   | 16.7  | 14.1                           | 18.7  | 1.8  | 21.3   | 20.2               | 22.1   | 0.8  | 21     |
| Zn      | 5.6                        | 3.9   | 7.4   | 1.3  | 6.2                  | 5.3    | 6.9    | 0.7  | 12.3                   | 10.5  | 15   | 2.1 | 9.1                  | 5.6  | 11.6   | 3.1  | 9.1                     | 6     | 14.2   | 5.6   | 3.9                            | 7.4   | 1.3  | 6.2    | 5.3                | 6.9    | 0.7  | 12.3   |
| Mn      | 1.4                        | 0.6   | 3     | 0.9  | 30.9                 | 21.6   | 49.3   | 12.4 | 1.5                    | 1.2   | 1.8  | 0.2 | 3                    | 2.5  | 3.8    | 0.7  | 4.7                     | 2.2   | 8.8    | 1.4   | 0.6                            | 3     | 0.9  | 30.9   | 21.6               | 49.3   | 12.4 | 1.5    |
| Sr      | 0.5                        | 0.4   | 0.6   | 0.1  | 1                    | 0.9    | 1.1    | 0.1  | 0.8                    | 0.7   | 1    | 0.2 | 0.7                  | 0.4  | 0.9    | 0.2  | 0.7                     | 0.6   | 1.1    | 0.5   | 0.4                            | 0.6   | 0.1  | 1      | 0.9                | 1.1    | 0.1  | 0.8    |
| Ba      | 1.7                        | 1.2   | 2.2   | 0.4  | 3.2                  | 2.2    | 4.2    | 0.9  | 3.7                    | 2.5   | 4.5  | 0.9 | 2.8                  | 1.4  | 4.5    | 1.6  | 2.8                     | 2     | 3.9    | 1.7   | 1.2                            | 2.2   | 0.4  | 3.2    | 2.2                | 4.2    | 0.9  | 3.7    |
| Cr      | 1.2                        | 1     | 1.3   | 0.1  | 1.5                  | 1.5    | 1.6    | 0.1  | 1.5                    | 1.3   | 1.7  | 0.2 | 1.3                  | 1.2  | 1.4    | 0.1  | 3.5                     | 1.4   | 6.6    | 1.2   | 1                              | 1.3   | 0.1  | 1.5    | 1.5                | 1.6    | 0.1  | 1.5    |
| Pb      | 0.9                        | 0.7   | 1.1   | 0.2  | 0.8                  | 0.6    | 1.1    | 0.2  | 4                      | 3     | 5.7  | 1.2 | 2.8                  | 1.7  | 3.8    | 1    | 3.1                     | 0.8   | 9.5    | 0.9   | 0.7                            | 1.1   | 0.2  | 0.8    | 0.6                | 1.1    | 0.2  | 4      |
| Cu      | 0.6                        | 0.5   | 0.9   | 0.1  | 1.4                  | 0.8    | 2      | 0.5  | 1.5                    | 0.8   | 2.8  | 0.9 | 0.9                  | 0.5  | 1.3    | 0.4  | 1.1                     | 0.7   | 1.9    | 0.6   | 0.5                            | 0.9   | 0.1  | 1.4    | 0.8                | 2      | 0.5  | 1.5    |

\*, <sup>43</sup>Ca, <sup>47</sup>Ti and <sup>57</sup>Fe

**Table S2** Results of trace elements in different types of foodborne pathogens by ICP-MS (ng/mL)

| Element | <i>Staphylococcus</i> spp. |       |       |       | <i>Listeria</i> spp. |       |       |       | <i>Salmonella</i> spp. |       |       |       | <i>Shigella</i> spp. |       |       |       | <i>Escherichia</i> spp. |       |       |       | <i>Yersinia enterocolitica</i> |       |       |       | <i>Vibrio</i> spp. |       |       |       |      |     |     |
|---------|----------------------------|-------|-------|-------|----------------------|-------|-------|-------|------------------------|-------|-------|-------|----------------------|-------|-------|-------|-------------------------|-------|-------|-------|--------------------------------|-------|-------|-------|--------------------|-------|-------|-------|------|-----|-----|
|         | mean                       | min   | max   | SD    | mean                 | min   | max   | SD    | mean                   | min   | max   | SD    | mean                 | min   | max   | SD    | mean                    | min   | max   | SD    | mean                           | min   | max   | SD    | mean               | min   | max   | SD    | mean | min | max |
| Se*     | 0.596                      | 0.38  | 0.715 | 0.144 | 0.745                | 0.67  | 0.905 | 0.108 | 0.705                  | 0.455 | 0.885 | 0.185 | 0.763                | 0.595 | 0.86  | 0.146 | 0.783                   | 0.67  | 0.905 | 0.596 | 0.38                           | 0.715 | 0.144 | 0.745 | 0.67               | 0.905 | 0.108 | 0.705 |      |     |     |
| Th      | 0.399                      | 0.3   | 0.58  | 0.108 | 0.248                | 0.215 | 0.29  | 0.033 | 0.226                  | 0.205 | 0.25  | 0.019 | 0.198                | 0.17  | 0.225 | 0.028 | 0.228                   | 0.175 | 0.3   | 0.399 | 0.3                            | 0.58  | 0.108 | 0.248 | 0.215              | 0.29  | 0.033 | 0.226 |      |     |     |
| W       | 0.226                      | 0.12  | 0.33  | 0.085 | 0.199                | 0.075 | 0.37  | 0.124 | 0.514                  | 0.06  | 1.105 | 0.52  | 0.06                 | 0.04  | 0.09  | 0.026 | 0.363                   | 0.05  | 1.745 | 0.226 | 0.12                           | 0.33  | 0.085 | 0.199 | 0.075              | 0.37  | 0.124 | 0.514 |      |     |     |
| Sb      | 0.279                      | 0.235 | 0.345 | 0.046 | 0.32                 | 0.275 | 0.365 | 0.037 | 0.423                  | 0.25  | 0.845 | 0.283 | 0.268                | 0.22  | 0.335 | 0.06  | 0.187                   | 0.145 | 0.27  | 0.279 | 0.235                          | 0.345 | 0.046 | 0.32  | 0.275              | 0.365 | 0.037 | 0.423 |      |     |     |
| Mo      | 0.143                      | 0.025 | 0.38  | 0.141 | 0.024                | 0.005 | 0.035 | 0.014 | 0.245                  | 0.125 | 0.405 | 0.136 | 0.155                | 0.06  | 0.25  | 0.095 | 0.309                   | 0.16  | 0.475 | 0.143 | 0.025                          | 0.38  | 0.141 | 0.024 | 0.005              | 0.035 | 0.014 | 0.245 |      |     |     |
| Zr      | 0.153                      | 0.115 | 0.185 | 0.03  | 0.15                 | 0.13  | 0.17  | 0.018 | 0.183                  | 0.155 | 0.23  | 0.034 | 0.138                | 0.125 | 0.16  | 0.019 | 0.153                   | 0.115 | 0.22  | 0.153 | 0.115                          | 0.185 | 0.03  | 0.15  | 0.13               | 0.17  | 0.018 | 0.183 |      |     |     |
| Sn      | 0.084                      | 0.07  | 0.1   | 0.011 | 0.113                | 0.075 | 0.19  | 0.053 | 0.141                  | 0.1   | 0.195 | 0.046 | 0.11                 | 0.075 | 0.155 | 0.041 | 0.091                   | 0.075 | 0.125 | 0.084 | 0.07                           | 0.1   | 0.011 | 0.113 | 0.075              | 0.19  | 0.053 | 0.141 |      |     |     |
| V       | 0.043                      | 0.03  | 0.06  | 0.011 | 0.051                | 0.045 | 0.06  | 0.006 | 0.075                  | 0.05  | 0.125 | 0.034 | 0.055                | 0.05  | 0.065 | 0.009 | 0.072                   | 0.04  | 0.115 | 0.043 | 0.03                           | 0.06  | 0.011 | 0.051 | 0.045              | 0.06  | 0.006 | 0.075 |      |     |     |
| Hg      | 0.107                      | 0.07  | 0.15  | 0.03  | 0.05                 | 0.035 | 0.065 | 0.012 | 0.12                   | 0.1   | 0.135 | 0.018 | 0.065                | 0.06  | 0.075 | 0.009 | 0.086                   | 0.05  | 0.125 | 0.107 | 0.07                           | 0.15  | 0.03  | 0.05  | 0.035              | 0.065 | 0.012 | 0.12  |      |     |     |
| Ce      | 0.074                      | 0.02  | 0.125 | 0.042 | 0.091                | 0.085 | 0.105 | 0.009 | 0.16                   | 0.125 | 0.195 | 0.031 | 0.058                | 0.05  | 0.07  | 0.01  | 0.063                   | 0.04  | 0.075 | 0.074 | 0.02                           | 0.125 | 0.042 | 0.091 | 0.085              | 0.105 | 0.009 | 0.16  |      |     |     |
| As      | 0.047                      | 0.035 | 0.065 | 0.012 | 0.055                | 0.05  | 0.06  | 0.004 | 0.073                  | 0.055 | 0.091 | 0.018 | 0.067                | 0.055 | 0.075 | 0.01  | 0.066                   | 0.055 | 0.085 | 0.047 | 0.035                          | 0.065 | 0.012 | 0.055 | 0.05               | 0.06  | 0.004 | 0.073 |      |     |     |
| Nb      | 0.032                      | 0.025 | 0.04  | 0.006 | 0.058                | 0.035 | 0.095 | 0.027 | 0.036                  | 0.03  | 0.045 | 0.006 | 0.032                | 0.03  | 0.035 | 0.003 | 0.037                   | 0.035 | 0.04  | 0.032 | 0.025                          | 0.04  | 0.006 | 0.058 | 0.035              | 0.095 | 0.027 | 0.036 |      |     |     |
| Co      | 0.015                      | 0.01  | 0.035 | 0.011 | 0.041                | 0.015 | 0.12  | 0.053 | 0.131                  | 0.015 | 0.475 | 0.229 | 0.017                | 0.01  | 0.025 | 0.008 | 0.036                   | 0.01  | 0.07  | 0.015 | 0.01                           | 0.035 | 0.011 | 0.041 | 0.015              | 0.12  | 0.053 | 0.131 |      |     |     |
| La      | 0.016                      | 0.005 | 0.025 | 0.007 | 0.016                | 0.01  | 0.03  | 0.009 | 0.041                  | 0.025 | 0.055 | 0.013 | 0.033                | 0.025 | 0.045 | 0.01  | 0.034                   | 0.02  | 0.04  | 0.016 | 0.005                          | 0.025 | 0.007 | 0.016 | 0.01               | 0.03  | 0.009 | 0.041 |      |     |     |
| Cd      | 0.027                      | 0.015 | 0.04  | 0.009 | 0.044                | 0.03  | 0.055 | 0.011 | 0.051                  | 0.03  | 0.065 | 0.015 | 0.035                | 0.02  | 0.055 | 0.018 | 0.026                   | 0.015 | 0.035 | 0.027 | 0.015                          | 0.04  | 0.009 | 0.044 | 0.03               | 0.055 | 0.011 | 0.051 |      |     |     |
| Nd      | 0.013                      | 0.01  | 0.02  | 0.004 | 0.013                | 0.01  | 0.015 | 0.003 | 0.038                  | 0.025 | 0.05  | 0.01  | 0.03                 | 0.02  | 0.035 | 0.009 | 0.025                   | 0.015 | 0.035 | 0.013 | 0.01                           | 0.02  | 0.004 | 0.013 | 0.01               | 0.015 | 0.003 | 0.038 |      |     |     |
| Y       | 0.024                      | 0.005 | 0.08  | 0.032 | 0.01                 | 0.01  | 0.01  | 0     | 0.016                  | 0.015 | 0.02  | 0.003 | 0.013                | 0.01  | 0.015 | 0.003 | 0.013                   | 0.01  | 0.015 | 0.024 | 0.005                          | 0.08  | 0.032 | 0.01  | 0.01               | 0.01  | 0     | 0.016 |      |     |     |
| Bi      | 0.017                      | 0.01  | 0.035 | 0.01  | 0.051                | 0.035 | 0.07  | 0.017 | 0.013                  | 0.005 | 0.025 | 0.009 | 0.022                | 0.015 | 0.03  | 0.008 | 0.008                   | 0.005 | 0.02  | 0.017 | 0.01                           | 0.035 | 0.01  | 0.051 | 0.035              | 0.07  | 0.017 | 0.013 |      |     |     |
| U       | 0.015                      | 0.005 | 0.025 | 0.008 | 0.029                | 0.01  | 0.075 | 0.031 | 0.016                  | 0.01  | 0.025 | 0.006 | 0.012                | 0.01  | 0.015 | 0.003 | 0.014                   | 0.01  | 0.025 | 0.015 | 0.005                          | 0.025 | 0.008 | 0.029 | 0.01               | 0.075 | 0.031 | 0.016 |      |     |     |
| Ag      | 0.024                      | 0.015 | 0.045 | 0.012 | 0.021                | 0.015 | 0.03  | 0.006 | 0.016                  | 0.015 | 0.02  | 0.003 | 0.015                | 0.01  | 0.02  | 0.005 | 0.012                   | 0.01  | 0.015 | 0.024 | 0.015                          | 0.045 | 0.012 | 0.021 | 0.015              | 0.03  | 0.006 | 0.016 |      |     |     |
| Hf      | 0.013                      | 0.01  | 0.015 | 0.003 | 0.011                | 0.01  | 0.015 | 0.003 | 0.014                  | 0.01  | 0.02  | 0.005 | 0.012                | 0.01  | 0.015 | 0.003 | 0.012                   | 0.005 | 0.015 | 0.013 | 0.01                           | 0.015 | 0.003 | 0.011 | 0.01               | 0.015 | 0.003 | 0.014 |      |     |     |
| Er      | 0                          | 0     | 0     | 0     | 0                    | 0     | 0     | 0     | 0.004                  | 0     | 0.005 | 0.003 | 0.01                 | 0.01  | 0.01  | 0     | 0.012                   | 0.005 | 0.02  | 0     | 0                              | 0     | 0     | 0     | 0                  | 0     | 0     | 0.004 |      |     |     |
| Dy      | 0.002                      | 0     | 0.005 | 0.003 | 0.003                | 0     | 0.005 | 0.003 | 0.008                  | 0.005 | 0.01  | 0.003 | 0.015                | 0.005 | 0.035 | 0.017 | 0.005                   | 0     | 0.005 | 0.002 | 0                              | 0.005 | 0.003 | 0.003 | 0                  | 0.005 | 0.003 | 0.008 |      |     |     |

|    |       |       |       |       |       |       |       |       |       |       |       |       |       |       |       |       |       |       |       |       |       |       |       |       |      |       |       |       |
|----|-------|-------|-------|-------|-------|-------|-------|-------|-------|-------|-------|-------|-------|-------|-------|-------|-------|-------|-------|-------|-------|-------|-------|-------|------|-------|-------|-------|
| Ga | 0.005 | 0.005 | 0.005 | 0     | 0.014 | 0.01  | 0.015 | 0.003 | 0.028 | 0.005 | 0.085 | 0.038 | 0.007 | 0.005 | 0.01  | 0.003 | 0.007 | 0.005 | 0.01  | 0.005 | 0.005 | 0.005 | 0     | 0.014 | 0.01 | 0.015 | 0.003 | 0.028 |
| Yb | 0     | 0     | 0     | 0     | 0     | 0     | 0     | 0     | 0.001 | 0     | 0.005 | 0.003 | 0     | 0     | 0     | 0     | 0     | 0     | 0     | 0     | 0     | 0     | 0     | 0     | 0    | 0     | 0     | 0.001 |
| Ta | 0.007 | 0.005 | 0.015 | 0.004 | 0.009 | 0.005 | 0.01  | 0.003 | 0.008 | 0.005 | 0.015 | 0.005 | 0.005 | 0.005 | 0     | 0.005 | 0.005 | 0.005 | 0.007 | 0.005 | 0.015 | 0.004 | 0.009 | 0.005 | 0.01 | 0.003 | 0.008 |       |
| Gd | 0.001 | 0     | 0.005 | 0.002 | 0.001 | 0     | 0.005 | 0.003 | 0.009 | 0.005 | 0.015 | 0.005 | 0.007 | 0.005 | 0.01  | 0.003 | 0.006 | 0     | 0.01  | 0.001 | 0     | 0.005 | 0.002 | 0.001 | 0    | 0.005 | 0.003 | 0.009 |
| Pr | 0.002 | 0     | 0.005 | 0.003 | 0.004 | 0     | 0.005 | 0.003 | 0.009 | 0.005 | 0.01  | 0.003 | 0.005 | 0.005 | 0.005 | 0     | 0.006 | 0.005 | 0.01  | 0.002 | 0     | 0.005 | 0.003 | 0.004 | 0    | 0.005 | 0.003 | 0.009 |
| Sm | 0.002 | 0     | 0.005 | 0.003 | 0.004 | 0     | 0.005 | 0.003 | 0.008 | 0.005 | 0.01  | 0.003 | 0.005 | 0.005 | 0.005 | 0     | 0.005 | 0     | 0.01  | 0.002 | 0     | 0.005 | 0.003 | 0.004 | 0    | 0.005 | 0.003 | 0.008 |
| Ho | 0     | 0     | 0     | 0     | 0     | 0     | 0     | 0     | 0.001 | 0     | 0.005 | 0.003 | 0     | 0     | 0     | 0     | 0     | 0     | 0     | 0     | 0     | 0     | 0     | 0     | 0    | 0     | 0     | 0.001 |
| Lu | 0     | 0     | 0     | 0     | 0     | 0     | 0     | 0     | 0     | 0     | 0     | 0     | 0     | 0     | 0     | 0     | 0     | 0     | 0     | 0     | 0     | 0     | 0     | 0     | 0    | 0     | 0     | 0     |
| Tm | 0     | 0     | 0     | 0     | 0     | 0     | 0     | 0     | 0     | 0     | 0     | 0     | 0     | 0     | 0     | 0     | 0     | 0     | 0     | 0     | 0     | 0     | 0     | 0     | 0    | 0     | 0     | 0     |
| Eu | 0.001 | 0     | 0.005 | 0.002 | 0     | 0     | 0     | 0     | 0     | 0     | 0     | 0     | 0.002 | 0     | 0.005 | 0.003 | 0     | 0     | 0     | 0.001 | 0     | 0.005 | 0.002 | 0     | 0    | 0     | 0     | 0     |
| Tb | 0     | 0     | 0     | 0     | 0     | 0     | 0     | 0     | 0     | 0     | 0     | 0     | 0     | 0     | 0     | 0     | 0     | 0     | 0     | 0     | 0     | 0     | 0     | 0     | 0    | 0     | 0     | 0     |

\*<sup>82</sup>Se
